# Supplementary material for: Understanding the causes of satellite–model discrepancies in aerosol–cloud interactions using near-LES simulations of marine boundary layer clouds
Source: Copernicus journal article supplement (doi:10.5194/acp-26-1769-2026), 2026-02-04
Supplement: Supplementary file [file acp-26-1769-2026-supplement-title-page.pdf › acp-26-1769-2026-supplement-title-page.pdf]

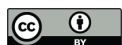

## *Supplement of*

# **Understanding the causes of satellite–model discrepancies in aerosol–cloud interactions using near-LES simulations of marine boundary layer clouds**

**Shaoyue Qiu et al.**

*Correspondence to:* Xue Zheng (zheng7@lnl.gov)

- [acp-26-1769-2026-supplement-title-page.pdf](#)
- [egusphere\\_2025\\_3465\\_supplement\\_final.pdf](#)
- [figS01.png](#)
- [figS02.png](#)
- [figS03.png](#)
- [figS04.png](#)
- [figS05.png](#)
- [figS06.png](#)
- [figS07.png](#)
- [figS08.png](#)
- [figS09.png](#)
- [figS10.png](#)

The copyright of individual parts of the supplement might differ from the article licence.
